# Supplementary material for: Regulatory effect of dietary nitrate on blood pressure: a meta-analysis of randomized controlled trials
Source: Royal Society of Chemistry journal article supplement (doi:10.1039/d2fo03140j), 2023-01-01
Supplement: d2fo03140j1.pdf [file d2fo03140j1.pdf]

Supplementary material 1-Participants' characteristics in the included trials on the effects of inorganic nitrate supplementation on blood pressure

| Year | Researcher            | Age (Young (<45)) | Intervention                                                                                             | Intervention time | Remarks | Dose (mmol) | sample size        |               | Systolic blood pressure (mmHg) |               | Diastolic blood pressure (mmHg) |               | 24-hour ambulatory systolic blood pressure (mmHg) |               | 24-hour ambulatory diastolic blood pressure (mmHg) |               | Mean arterial pressure (mmHg) |               |
|------|-----------------------|-------------------|----------------------------------------------------------------------------------------------------------|-------------------|---------|-------------|--------------------|---------------|--------------------------------|---------------|---------------------------------|---------------|---------------------------------------------------|---------------|----------------------------------------------------|---------------|-------------------------------|---------------|
|      |                       |                   |                                                                                                          |                   |         |             | Experimental group | Control group | Experimental group             | Control group | Experimental group              | Control group | Experimental group                                | Control group | Experimental group                                 | Control group | Experimental group            | Control group |
|      |                       |                   |                                                                                                          |                   |         |             | n                  | n             | mean±SD                        | mean±SD       | mean±SD                         | mean±SD       | mean±SD                                           | mean±SD       | mean±SD                                            | mean±SD       | mean±SD                       | mean±SD       |
| 2019 | Jui-Lin Fein          | Young             | Oral sodium nitrate                                                                                      | 1W                |         | 7.3         | 17                 | 17            | 102±8.4                        | 101.3±9.4     | 66.6±6.9                        | 65.3±5.5      |                                                   |               |                                                    |               |                               |               |
| 2018 | Aaron C               | Old               | Beetroot powder                                                                                          | 4W                |         | 4.0         | 13                 | 13            | 120±14.4                       | 124±14.4      | 73±7.2                          | 76±7.2        |                                                   |               |                                                    |               | 93±7.2                        | 91±7.2        |
| 2017 | Clare M. Eglin        | Young             | Nitrate-rich Beet Juice                                                                                  | 1D                |         | 11.9        |                    | 13            | 124±13                         | 121±9         | 76±11                           | 74±10         |                                                   |               |                                                    |               | 92±11                         | 90±9          |
| 2017 | Kyle Raubenheimer     | Old               | Nitrate-rich beet juice                                                                                  | 1D                |         | 12.9        | 12                 | 12            | 128.7±21                       | 136.2±18      | 61.5±10.5                       | 67.7±12.6     |                                                   |               |                                                    |               | 84.1±12.4                     | 90.7±13       |
| 2016 | Anthony L.            | Young 16 Old 15   | Nitrate-depleted beet juice                                                                              | 1W                |         | 11.9        | 31                 | 31            | 112.8±9.8                      | 114.9±7.9     | 73.2±8.7                        | 73.5±8.0      |                                                   |               |                                                    |               |                               |               |
| 2014 | Ann Ashworth          | Young             | High nitrate diet (vegetables)                                                                           | 1W                |         | 5.5         | 19                 | 19            | 103±6                          | 106±8         | 61±5                            | 61±6          |                                                   |               |                                                    |               | 76±4                          | 78±6          |
| 2013 | Alex H. Liu           | Old               | Diet with nitrate                                                                                        | 1D                |         | 3.54        | 26                 | 26            | 113.4±11.2                     | 118.8±10.2    | 65.4±6.1                        | 66.8±5.1      |                                                   |               |                                                    |               |                               |               |
| 2012 | Leah T Coles          | Old               | Beet juice with nitrate                                                                                  | 1D                |         | 15.0        | 30                 | 30            | 126.6±8.2                      | 128.3±10.4    | 77.6±7.1                        | 77.8±9.3      |                                                   |               |                                                    |               |                               |               |
| 2012 | M. Bahra              | Young             | Oral potassium nitrate                                                                                   | 1D                |         | 8.0         | 14                 | 14            | 112±13.4                       | 114.9±10.9    | 67.5±4.9                        | 66.1±6.7      |                                                   |               |                                                    |               |                               |               |
| 2014 | E. Turner             | Young             | Beet juice                                                                                               | 2W                |         | 6.5         | 12                 | 12            | 127±12.1                       | 129.4±10.4    | 77.2±8.7                        | 79.1±7.6      |                                                   |               |                                                    |               |                               |               |
| 2014 | Catherine P Bondonno  | 21-75 years old   | Spinach + Green leafy vegetables                                                                         | 1W                |         | 4.8         | 38                 | 38            | 126.2±11.8                     | 130±10.8      | 70.7±8.8                        | 70.5±6.4      | 129.4±8.7                                         | 127.2±7.1     | 77.3±8.3                                           | 76.3±7        |                               |               |
| 2010 | Tanja Sobko           | Young             | Nitrate-rich vegetables (Japanese diet)                                                                  | 10D               |         | 18.8        | 25                 | 25            |                                |               | 71.3±7.9                        | 75.8±7.8      |                                                   |               |                                                    |               |                               |               |
| 2020 | Michaela L Sundqvist  | Old               | Vegetable group: vegetable + placebo pill<br>Pill group: low-nitrate vegetables + potassium nitrate pill | 5W                |         | 4.8         | 76                 | 78            | 131.9±9.6                      | 133.9±10.2    | 88.2±7.2                        | 88.9±8.6      |                                                   |               |                                                    |               |                               |               |
|      |                       |                   |                                                                                                          |                   |         |             |                    |               |                                |               |                                 |               | 4.8                                               | 77            | 78                                                 | 135.2±11.1    | 90.3±8.1                      |               |
| 2015 | Catherine P Bondonno  | Old               | Beet juice                                                                                               | 1W                |         | 12.9        | 27                 | 27            | 127.5±24.5                     | 128±11.8      | 73±8.2                          | 72.7±8.1      | 127.4±11.2                                        | 128.4±11.2    | 73.8±9.5                                           | 74.4±9.6      |                               |               |
| 2018 | Conor P. Kerley       | Old               | Beet juice                                                                                               | 1W                |         | 12.9        | 20                 | 20            |                                |               |                                 |               | 129±9                                             | 133±7         | 76±8                                               | 79±7          |                               |               |
| 2019 | Ryan M. Broxterran    | Old               | Beet juice                                                                                               | 1w                |         | 6.2         | 13                 | 13            | 129±16                         | 132±20        | 77±12                           | 78±12         |                                                   |               |                                                    |               |                               |               |
|      |                       |                   |                                                                                                          |                   |         |             |                    |               |                                |               |                                 |               | 14                                                | 14            | 136±16                                             | 141±19        | 84±13                         | 88±12         |
| 2020 | Mario Siervo          | Old               | Beet juice + placebo capsules                                                                            | 60D               |         | 6.5         | 16                 | 16            | 145.9±12.6                     | 148.9±17      | 90.3±8.4                        | 86.8±11.7     | 133.8±12.5                                        | 138.2±13.9    | 86.1±11.3                                          | 85.7±9.6      |                               |               |
| 2018 | Lauren C Blekkenhorst | Old               | High nitrate diet: 150mg/d<br>Low nitrate diet: 22mg/d                                                   | 4W                |         | 2.4         | 30                 | 30            | 128.4±8.9                      | 130±7.6       | 75.3±7.2                        | 76.5±5.7      | 126.5±5.1                                         | 125.9±7       | 75.2±7.9                                           | 75.0±8.3      |                               |               |
|      |                       |                   |                                                                                                          |                   |         |             |                    |               |                                |               |                                 |               |                                                   |               |                                                    |               | 0.4                           |               |
| 2021 | Michaela L. Sundqvist | Old               | Potassium nitrate                                                                                        | 5W                |         | 4.8         | 77                 | 78            |                                |               |                                 |               | 127.10±11.1                                       | 130.5±10.1    | 78.9±7.1                                           | 78.9±7.7      |                               |               |
